# Supplementary material for: Comprehensive bioinformatic analysis of the expression and prognostic significance of TSC22D domain family genes in acute myeloid leukemia
Source: Research Square preprint supplement (doi:10.21203/rs.3.rs-1209284/v2), 2022-03-28
Supplement: Supplementary file 1 [file 71f38c5cecdfed064908ccd4.xlsx]

## Sheet: Expression 21Q3 Public
Depmap ID	Primary Disease	Lineage	Lineage Subtype	Cell Line Name	TSC22D1 Expression	TSC22D2 Expression	TSC22D3 Expression	TSC22D4 Expression
ACH-000002	Leukemia	Blood	AML	HL60	1.5656	2.28983	3.26903	5.14037
ACH-000004	Leukemia	Blood	AML	HEL	5.55152	2.87184	5.23879	5.15462
ACH-000005	Leukemia	Blood	AML	HEL9217	6.18587	3.6792	3.6241	4.85798
ACH-000006	Leukemia	Blood	AML	MONOMAC6	3.21257	3.3799	6.10077	5.49217
ACH-000034	Leukemia	Blood	AML	PLB985	1.91456	2.41954	7.16972	5.25248
ACH-000045	Leukemia	Blood	AML	MV411	1.10434	2.24184	4.21801	5.3147
ACH-000065	Leukemia	Blood	AML	OCIAML5	3.63923	2.86394	4.22265	5.56163
ACH-000080	Leukemia	Blood	AML	BDCM	0.807355	2.80529	4.61589	5.46238
ACH-000081	Leukemia	Blood	AML	GDM1	5.69432	2.72901	4.19219	5.85125
ACH-000084	Leukemia	Blood	AML	MUTZ3	5.33557	3.93923	3.14241	6.30323
ACH-000112	Leukemia	Blood	AML	SIGM5	3.01792	2.73552	6.88594	5.22072
ACH-000113	Leukemia	Blood	AML	OCIAML2	3.62994	2.49825	3.94017	5.22033
ACH-000146	Leukemia	Blood	AML	THP1	4.15704	3.0072	3.96347	5.70044
ACH-000166	Leukemia	Blood	AML	KASUMI6	4.96162	3.39643	1.66448	5.87725
ACH-000168	Leukemia	Blood	AML	NOMO1	2.7845	2.86987	3.51728	5.79727
ACH-000195	Leukemia	Blood	AML	SET2	4.97774	3.10266	3.32769	5.49506
ACH-000198	Leukemia	Blood	AML	EOL1	1.1177	2.58496	4.52982	5.61706
ACH-000218	Leukemia	Blood	AML	PL21	4.20477	3.60999	5.84122	6.25569
ACH-000263	Leukemia	Blood	AML	KASUMI1	4.65306	2.81967	3.60051	5.58346
ACH-000294	Leukemia	Blood	AML	NB4	3.15056	2.45681	4.76182	6.31922
ACH-000299	Leukemia	Blood	AML	HNT34	4.70764	2.55827	5.80323	5.5598
ACH-000336	Leukemia	Blood	AML	OCIAML3	0.378512	2.17951	5.08151	6.60377
ACH-000362	Leukemia	Blood	AML	MOLM13	2.88947	2.37851	5.52074	5.11437
ACH-000369	Leukemia	Blood	AML	MOLM16	4.70764	3.07039	0.731183	5.79233
ACH-000373	Leukemia	Blood	AML	SKM1	4.14405	2.91648	4.70543	5.71973
ACH-000386	Leukemia	Blood	AML	KG1	5.13175	3.59216	3.28836	5.01078
ACH-000387	Leukemia	Blood	AML	TF1	5.51979	2.6893	0.584963	5.28688
ACH-000406	Leukemia	Blood	AML	U937	3.53854	2.70708	6.34536	6.23132
ACH-000439	Leukemia	Blood	AML	ME1	4.68874	1.92979	1.98185	5.68145
ACH-000487	Leukemia	Blood	AML	F36P	5.33163	3.46728	1.87578	5.8009
ACH-000498	Leukemia	Blood	AML	KO52	4.84348	2.92029	3.19692	4.60288
ACH-000557	Leukemia	Blood	AML	AML193	4.39369	3.774	5.51412	6.81121
ACH-000602	Leukemia	Blood	AML	M07E	5.44062	3.80941	2.28096	5.83188
ACH-000641	Leukemia	Blood	AML	CMK	3.69599	2.86394	3.92884	6.36212
ACH-000751	Leukemia	Blood	AML	OCIM1	6.95803	2.74846	5.62585	5.99548
ACH-000770	Leukemia	Blood	AML	P31FUJ	5.67044	3.51602	7.12309	6.76155
ACH-001036	Leukemia	Blood	AML	CMK115	4.27426	2.80116	2.22959	5.35509
ACH-001129	Leukemia	Blood	AML	MONOMAC1	4.01078	3.45022	5.79468	5.64818
ACH-001574	Leukemia	Blood	AML	MOLM14	1.87184	2.7845	4.78607	4.88264
ACH-001577	Leukemia	Blood	AML	MUTZ8	4.77716	2.46205	4.06437	5.38336
ACH-001613	Leukemia	Blood	AML	OCIAML4	4.29352	5.60377	4.51665	3.73985
ACH-001618	Leukemia	Blood	AML	OCIM2	5.5373	3.04614	0	4.26754
ACH-001647	Leukemia	Blood	AML	SHI1	2.98003	2.71149	4.93452	3.90785
ACH-001656	Leukemia	Blood	AML	SKNO1	4.45812	2.23573	4.16511	6.11437
