# Supplementary material for: Comprehensive bioinformatic analysis of the expression and prognostic significance of TSC22D domain family genes in acute myeloid leukemia
Source: Research Square preprint supplement (doi:10.21203/rs.3.rs-1209284/v2), 2022-03-28
Supplement: Supplementary file 3 [file a3a4112c0e3d0c3d55ecd65e.xlsx]

## Sheet: TSC22D1 （Valk Leukemia -215111）
Sample name	Sample source	Log2（TSC22D1 Expression）
GSM20974	Normal Tissue Type：Bone Marrow	1.40529
GSM20973	Normal Tissue Type：Bone Marrow	1.93148
GSM20970	Normal Tissue Type：Bone Marrow	2.24867
GSM20972	Normal Tissue Type：Bone Marrow	2.36988
GSM20971	Normal Tissue Type：Bone Marrow	2.80535
GSM20968	CD34-Positive Peripheral Blood Cell	4.07325
GSM20969	CD34-Positive Peripheral Blood Cell	4.45425
GSM20967	CD34-Positive Peripheral Blood Cell	4.51744
GSM20763	Acute Myeloid Leukemia	0.3028
GSM20687	Acute Myeloid Leukemia	0.3356
GSM20965	Acute Myeloid Leukemia	0.53142
GSM20891	Acute Myeloid Leukemia	0.55095
GSM20704	Acute Myeloid Leukemia	0.59706
GSM20793	Acute Myeloid Leukemia	0.61059
GSM20805	Acute Myeloid Leukemia	0.67962
GSM20696	Acute Myeloid Leukemia	0.71193
GSM20894	Acute Myeloid Leukemia	0.73845
GSM20753	Acute Myeloid Leukemia	0.73915
GSM20875	Acute Myeloid Leukemia	0.78335
GSM20688	Acute Myeloid Leukemia	0.84298
GSM20930	Acute Myeloid Leukemia	0.86162
GSM20847	Acute Myeloid Leukemia	0.87047
GSM20923	Acute Myeloid Leukemia	0.8709
GSM20928	Acute Myeloid Leukemia	0.90046
GSM20867	Acute Myeloid Leukemia	0.96244
GSM20903	Acute Myeloid Leukemia	0.98052
GSM20716	Acute Myeloid Leukemia	0.99387
GSM20697	Acute Myeloid Leukemia	1.00425
GSM20933	Acute Myeloid Leukemia	1.01862
GSM20728	Acute Myeloid Leukemia	1.02004
GSM20937	Acute Myeloid Leukemia	1.03159
GSM20755	Acute Myeloid Leukemia	1.07557
GSM20848	Acute Myeloid Leukemia	1.07741
GSM20953	Acute Myeloid Leukemia	1.0998
GSM20871	Acute Myeloid Leukemia	1.13937
GSM20918	Acute Myeloid Leukemia	1.16768
GSM20879	Acute Myeloid Leukemia	1.26537
GSM20778	Acute Myeloid Leukemia	1.27019
GSM20822	Acute Myeloid Leukemia	1.27155
GSM20815	Acute Myeloid Leukemia	1.28589
GSM20842	Acute Myeloid Leukemia	1.3062
GSM20740	Acute Myeloid Leukemia	1.33768
GSM20788	Acute Myeloid Leukemia	1.41725
GSM20954	Acute Myeloid Leukemia	1.47556
GSM20964	Acute Myeloid Leukemia	1.48605
GSM20818	Acute Myeloid Leukemia	1.52746
GSM20963	Acute Myeloid Leukemia	1.55048
GSM20723	Acute Myeloid Leukemia	1.56202
GSM20786	Acute Myeloid Leukemia	1.56207
GSM20844	Acute Myeloid Leukemia	1.58792
GSM20838	Acute Myeloid Leukemia	1.59714
GSM20707	Acute Myeloid Leukemia	1.61712
GSM20845	Acute Myeloid Leukemia	1.63172
GSM20821	Acute Myeloid Leukemia	1.66735
GSM20939	Acute Myeloid Leukemia	1.67065
GSM20955	Acute Myeloid Leukemia	1.73697
GSM20772	Acute Myeloid Leukemia	1.751
GSM20785	Acute Myeloid Leukemia	1.75323
GSM20866	Acute Myeloid Leukemia	1.75502
GSM20780	Acute Myeloid Leukemia	1.79325
GSM20960	Acute Myeloid Leukemia	1.79393
GSM20949	Acute Myeloid Leukemia	1.80416
GSM20795	Acute Myeloid Leukemia	1.80792
GSM20791	Acute Myeloid Leukemia	1.84139
GSM20941	Acute Myeloid Leukemia	1.84951
GSM20901	Acute Myeloid Leukemia	1.86159
GSM20712	Acute Myeloid Leukemia	1.88231
GSM20936	Acute Myeloid Leukemia	1.88924
GSM20841	Acute Myeloid Leukemia	1.89585
GSM20748	Acute Myeloid Leukemia	1.93422
GSM20938	Acute Myeloid Leukemia	1.94397
GSM20744	Acute Myeloid Leukemia	1.95508
GSM20890	Acute Myeloid Leukemia	1.9731
GSM20932	Acute Myeloid Leukemia	2.00128
GSM20765	Acute Myeloid Leukemia	2.03365
GSM20817	Acute Myeloid Leukemia	2.03431
GSM20796	Acute Myeloid Leukemia	2.03684
GSM20807	Acute Myeloid Leukemia	2.03762
GSM20912	Acute Myeloid Leukemia	2.07142
GSM20806	Acute Myeloid Leukemia	2.07728
GSM20706	Acute Myeloid Leukemia	2.09074
GSM20689	Acute Myeloid Leukemia	2.09239
GSM20743	Acute Myeloid Leukemia	2.10406
GSM20804	Acute Myeloid Leukemia	2.11693
GSM20836	Acute Myeloid Leukemia	2.12125
GSM20831	Acute Myeloid Leukemia	2.14119
GSM20819	Acute Myeloid Leukemia	2.14559
GSM20824	Acute Myeloid Leukemia	2.14999
GSM20927	Acute Myeloid Leukemia	2.1592
GSM20761	Acute Myeloid Leukemia	2.16947
GSM19383	Acute Myeloid Leukemia	2.19381
GSM20776	Acute Myeloid Leukemia	2.19585
GSM20900	Acute Myeloid Leukemia	2.20207
GSM20684	Acute Myeloid Leukemia	2.20716
GSM20860	Acute Myeloid Leukemia	2.22111
GSM20782	Acute Myeloid Leukemia	2.22718
GSM20852	Acute Myeloid Leukemia	2.23266
GSM20861	Acute Myeloid Leukemia	2.24366
GSM20909	Acute Myeloid Leukemia	2.26667
GSM20801	Acute Myeloid Leukemia	2.26729
GSM20966	Acute Myeloid Leukemia	2.30261
GSM20713	Acute Myeloid Leukemia	2.30475
GSM20839	Acute Myeloid Leukemia	2.30512
GSM20934	Acute Myeloid Leukemia	2.30605
GSM20948	Acute Myeloid Leukemia	2.31211
GSM20840	Acute Myeloid Leukemia	2.32325
GSM20691	Acute Myeloid Leukemia	2.3234
GSM20883	Acute Myeloid Leukemia	2.32391
GSM20942	Acute Myeloid Leukemia	2.32872
GSM20739	Acute Myeloid Leukemia	2.35669
GSM20775	Acute Myeloid Leukemia	2.35764
GSM20727	Acute Myeloid Leukemia	2.36518
GSM20961	Acute Myeloid Leukemia	2.36658
GSM20767	Acute Myeloid Leukemia	2.37428
GSM20794	Acute Myeloid Leukemia	2.39646
GSM20809	Acute Myeloid Leukemia	2.42309
GSM20754	Acute Myeloid Leukemia	2.43253
GSM20859	Acute Myeloid Leukemia	2.45379
GSM20693	Acute Myeloid Leukemia	2.47443
GSM20940	Acute Myeloid Leukemia	2.48285
GSM20878	Acute Myeloid Leukemia	2.49808
GSM20854	Acute Myeloid Leukemia	2.50272
GSM20837	Acute Myeloid Leukemia	2.50862
GSM20702	Acute Myeloid Leukemia	2.54149
GSM20729	Acute Myeloid Leukemia	2.54554
GSM20897	Acute Myeloid Leukemia	2.58558
GSM20952	Acute Myeloid Leukemia	2.58786
GSM20757	Acute Myeloid Leukemia	2.59126
GSM20692	Acute Myeloid Leukemia	2.59958
GSM20906	Acute Myeloid Leukemia	2.62096
GSM20771	Acute Myeloid Leukemia	2.6214
GSM20705	Acute Myeloid Leukemia	2.69683
GSM20880	Acute Myeloid Leukemia	2.70763
GSM20884	Acute Myeloid Leukemia	2.71126
GSM20846	Acute Myeloid Leukemia	2.75601
GSM20721	Acute Myeloid Leukemia	2.76422
GSM20907	Acute Myeloid Leukemia	2.76674
GSM20770	Acute Myeloid Leukemia	2.76978
GSM20886	Acute Myeloid Leukemia	2.77222
GSM20701	Acute Myeloid Leukemia	2.7761
GSM20779	Acute Myeloid Leukemia	2.77703
GSM20773	Acute Myeloid Leukemia	2.78254
GSM20911	Acute Myeloid Leukemia	2.81037
GSM20950	Acute Myeloid Leukemia	2.84191
GSM20885	Acute Myeloid Leukemia	2.86598
GSM20814	Acute Myeloid Leukemia	2.86657
GSM20759	Acute Myeloid Leukemia	2.89393
GSM20892	Acute Myeloid Leukemia	2.8903
GSM20715	Acute Myeloid Leukemia	2.89524
GSM20864	Acute Myeloid Leukemia	2.9083
GSM19382	Acute Myeloid Leukemia	2.92049
GSM20881	Acute Myeloid Leukemia	2.92237
GSM20902	Acute Myeloid Leukemia	2.92437
GSM20694	Acute Myeloid Leukemia	2.92911
GSM20734	Acute Myeloid Leukemia	2.9382
GSM20768	Acute Myeloid Leukemia	2.9485
GSM20725	Acute Myeloid Leukemia	2.95659
GSM20708	Acute Myeloid Leukemia	2.98928
GSM20762	Acute Myeloid Leukemia	3.00571
GSM20783	Acute Myeloid Leukemia	3.01028
GSM20862	Acute Myeloid Leukemia	3.0218
GSM20686	Acute Myeloid Leukemia	3.03254
GSM20843	Acute Myeloid Leukemia	3.04475
GSM20876	Acute Myeloid Leukemia	3.06556
GSM20811	Acute Myeloid Leukemia	3.07183
GSM20865	Acute Myeloid Leukemia	3.07617
GSM20935	Acute Myeloid Leukemia	3.07783
GSM20869	Acute Myeloid Leukemia	3.08296
GSM20917	Acute Myeloid Leukemia	3.08866
GSM20888	Acute Myeloid Leukemia	3.09903
GSM20959	Acute Myeloid Leukemia	3.10529
GSM20895	Acute Myeloid Leukemia	3.10646
GSM20943	Acute Myeloid Leukemia	3.11669
GSM20957	Acute Myeloid Leukemia	3.11748
GSM20834	Acute Myeloid Leukemia	3.12853
GSM20946	Acute Myeloid Leukemia	3.16706
GSM20830	Acute Myeloid Leukemia	3.17304
GSM20808	Acute Myeloid Leukemia	3.17551
GSM20789	Acute Myeloid Leukemia	3.19609
GSM20899	Acute Myeloid Leukemia	3.19379
GSM20916	Acute Myeloid Leukemia	3.20795
GSM20724	Acute Myeloid Leukemia	3.21584
GSM20925	Acute Myeloid Leukemia	3.23153
GSM20769	Acute Myeloid Leukemia	3.25142
GSM20714	Acute Myeloid Leukemia	3.25705
GSM20904	Acute Myeloid Leukemia	3.26871
GSM20931	Acute Myeloid Leukemia	3.27245
GSM20722	Acute Myeloid Leukemia	3.28762
GSM20756	Acute Myeloid Leukemia	3.29113
GSM20703	Acute Myeloid Leukemia	3.29774
GSM20820	Acute Myeloid Leukemia	3.30493
GSM20745	Acute Myeloid Leukemia	3.31738
GSM20857	Acute Myeloid Leukemia	3.3318
GSM20747	Acute Myeloid Leukemia	3.34461
GSM20877	Acute Myeloid Leukemia	3.35179
GSM20758	Acute Myeloid Leukemia	3.36377
GSM20751	Acute Myeloid Leukemia	3.38033
GSM20698	Acute Myeloid Leukemia	3.4255
GSM20730	Acute Myeloid Leukemia	3.43548
GSM20766	Acute Myeloid Leukemia	3.43643
GSM20797	Acute Myeloid Leukemia	3.44217
GSM20784	Acute Myeloid Leukemia	3.45547
GSM20735	Acute Myeloid Leukemia	3.46049
GSM20799	Acute Myeloid Leukemia	3.47519
GSM20812	Acute Myeloid Leukemia	3.48919
GSM20746	Acute Myeloid Leukemia	3.48979
GSM20813	Acute Myeloid Leukemia	3.49031
GSM20849	Acute Myeloid Leukemia	3.53128
GSM20868	Acute Myeloid Leukemia	3.53784
GSM20732	Acute Myeloid Leukemia	3.57882
GSM20827	Acute Myeloid Leukemia	3.59921
GSM20908	Acute Myeloid Leukemia	3.60742
GSM20958	Acute Myeloid Leukemia	3.60892
GSM20882	Acute Myeloid Leukemia	3.61904
GSM20685	Acute Myeloid Leukemia	3.66907
GSM20699	Acute Myeloid Leukemia	3.66936
GSM20736	Acute Myeloid Leukemia	3.68837
GSM20726	Acute Myeloid Leukemia	3.6975
GSM20720	Acute Myeloid Leukemia	3.70015
GSM20709	Acute Myeloid Leukemia	3.70732
GSM20926	Acute Myeloid Leukemia	3.72128
GSM20887	Acute Myeloid Leukemia	3.74059
GSM20835	Acute Myeloid Leukemia	3.74741
GSM20731	Acute Myeloid Leukemia	3.75097
GSM20717	Acute Myeloid Leukemia	3.75636
GSM20874	Acute Myeloid Leukemia	3.75847
GSM20777	Acute Myeloid Leukemia	3.76019
GSM20915	Acute Myeloid Leukemia	3.7739
GSM20913	Acute Myeloid Leukemia	3.78512
GSM20910	Acute Myeloid Leukemia	3.78555
GSM20872	Acute Myeloid Leukemia	3.79003
GSM20798	Acute Myeloid Leukemia	3.79661
GSM20873	Acute Myeloid Leukemia	3.79673
GSM20803	Acute Myeloid Leukemia	3.81892
GSM20858	Acute Myeloid Leukemia	3.83862
GSM20816	Acute Myeloid Leukemia	3.84634
GSM20856	Acute Myeloid Leukemia	3.85825
GSM20921	Acute Myeloid Leukemia	3.86093
GSM20718	Acute Myeloid Leukemia	3.86642
GSM20832	Acute Myeloid Leukemia	3.88207
GSM20787	Acute Myeloid Leukemia	3.89266
GSM20870	Acute Myeloid Leukemia	3.9055
GSM20695	Acute Myeloid Leukemia	3.90982
GSM20828	Acute Myeloid Leukemia	3.94477
GSM20774	Acute Myeloid Leukemia	3.94983
GSM20749	Acute Myeloid Leukemia	3.98811
GSM20742	Acute Myeloid Leukemia	4.00975
GSM20781	Acute Myeloid Leukemia	4.02647
GSM20914	Acute Myeloid Leukemia	4.04137
GSM20951	Acute Myeloid Leukemia	4.06859
GSM20920	Acute Myeloid Leukemia	4.07048
GSM20792	Acute Myeloid Leukemia	4.07515
GSM20700	Acute Myeloid Leukemia	4.12621
GSM20690	Acute Myeloid Leukemia	4.13764
GSM20962	Acute Myeloid Leukemia	4.14753
GSM20905	Acute Myeloid Leukemia	4.17292
GSM20853	Acute Myeloid Leukemia	4.19214
GSM20710	Acute Myeloid Leukemia	4.20735
GSM20945	Acute Myeloid Leukemia	4.26329
GSM20738	Acute Myeloid Leukemia	4.27415
GSM20810	Acute Myeloid Leukemia	4.27565
GSM20850	Acute Myeloid Leukemia	4.28588
GSM20823	Acute Myeloid Leukemia	4.29136
GSM20733	Acute Myeloid Leukemia	4.29577
GSM20898	Acute Myeloid Leukemia	4.31412
GSM20719	Acute Myeloid Leukemia	4.31536
GSM20741	Acute Myeloid Leukemia	4.31721
GSM20947	Acute Myeloid Leukemia	4.3293
GSM20944	Acute Myeloid Leukemia	4.36831
GSM20825	Acute Myeloid Leukemia	4.39879
GSM20760	Acute Myeloid Leukemia	4.43281
GSM20855	Acute Myeloid Leukemia	4.45224
GSM20924	Acute Myeloid Leukemia	4.47854
GSM20851	Acute Myeloid Leukemia	4.53856
GSM20764	Acute Myeloid Leukemia	4.5568
GSM20956	Acute Myeloid Leukemia	4.57519
GSM20826	Acute Myeloid Leukemia	4.59535
GSM20802	Acute Myeloid Leukemia	4.65538
GSM20922	Acute Myeloid Leukemia	4.6621
GSM20737	Acute Myeloid Leukemia	4.74354
GSM20929	Acute Myeloid Leukemia	4.78387
GSM20889	Acute Myeloid Leukemia	4.81149
GSM20790	Acute Myeloid Leukemia	4.83821
GSM20896	Acute Myeloid Leukemia	4.94042
GSM20893	Acute Myeloid Leukemia	4.97876
GSM20800	Acute Myeloid Leukemia	5.19081
GSM20750	Acute Myeloid Leukemia	5.19184
GSM20829	Acute Myeloid Leukemia	5.21378
GSM20919	Acute Myeloid Leukemia	5.26578
GSM20833	Acute Myeloid Leukemia	5.30701
GSM20752	Acute Myeloid Leukemia	5.33846
GSM20863	Acute Myeloid Leukemia	5.52043
GSM20711	Acute Myeloid Leukemia	5.58459

## Sheet: TSC22D2 （Valk Leukemia-204094）
Sample name	Sample source	Log2（TSC22D2 Expression）
GSM20972	Normal Tissue Type：Bone Marrow	1.10309
GSM20971	Normal Tissue Type：Bone Marrow	1.27928
GSM20970	Normal Tissue Type：Bone Marrow	1.38014
GSM20974	Normal Tissue Type：Bone Marrow	1.66598
GSM20973	Normal Tissue Type：Bone Marrow	1.71136
GSM20968	CD34-Positive Peripheral Blood Cell	1.26303
GSM20969	CD34-Positive Peripheral Blood Cell	1.34113
GSM20967	CD34-Positive Peripheral Blood Cell	1.56541
GSM20846	Acute Myeloid Leukemia	0.09437
GSM20837	Acute Myeloid Leukemia	0.17442
GSM20727	Acute Myeloid Leukemia	0.32888
GSM20691	Acute Myeloid Leukemia	0.57883
GSM20860	Acute Myeloid Leukemia	0.60511
GSM20845	Acute Myeloid Leukemia	0.60853
GSM20814	Acute Myeloid Leukemia	0.63048
GSM20848	Acute Myeloid Leukemia	0.66722
GSM20939	Acute Myeloid Leukemia	0.67065
GSM20959	Acute Myeloid Leukemia	0.72991
GSM20875	Acute Myeloid Leukemia	0.75233
GSM20897	Acute Myeloid Leukemia	0.78163
GSM20763	Acute Myeloid Leukemia	0.79122
GSM20963	Acute Myeloid Leukemia	0.80004
GSM20720	Acute Myeloid Leukemia	0.81274
GSM20806	Acute Myeloid Leukemia	0.8162
GSM20877	Acute Myeloid Leukemia	0.81723
GSM20903	Acute Myeloid Leukemia	0.83227
GSM20886	Acute Myeloid Leukemia	0.83443
GSM20788	Acute Myeloid Leukemia	0.88762
GSM20769	Acute Myeloid Leukemia	0.91264
GSM20820	Acute Myeloid Leukemia	0.94579
GSM20721	Acute Myeloid Leukemia	0.95446
GSM20829	Acute Myeloid Leukemia	0.95515
GSM20815	Acute Myeloid Leukemia	0.96461
GSM20841	Acute Myeloid Leukemia	0.97428
GSM20770	Acute Myeloid Leukemia	0.98181
GSM20927	Acute Myeloid Leukemia	0.98513
GSM20865	Acute Myeloid Leukemia	0.98544
GSM20907	Acute Myeloid Leukemia	0.98798
GSM20773	Acute Myeloid Leukemia	1.00954
GSM20859	Acute Myeloid Leukemia	1.01233
GSM20868	Acute Myeloid Leukemia	1.01407
GSM20883	Acute Myeloid Leukemia	1.01477
GSM20937	Acute Myeloid Leukemia	1.02606
GSM20878	Acute Myeloid Leukemia	1.03321
GSM20726	Acute Myeloid Leukemia	1.04439
GSM20914	Acute Myeloid Leukemia	1.04718
GSM20942	Acute Myeloid Leukemia	1.6803
GSM20785	Acute Myeloid Leukemia	1.07957
GSM20744	Acute Myeloid Leukemia	1.11154
GSM20904	Acute Myeloid Leukemia	1.11428
GSM20958	Acute Myeloid Leukemia	1.12078
GSM20941	Acute Myeloid Leukemia	1.12175
GSM20842	Acute Myeloid Leukemia	1.12292
GSM20772	Acute Myeloid Leukemia	1.13124
GSM20839	Acute Myeloid Leukemia	1.13421
GSM20835	Acute Myeloid Leukemia	1.1399
GSM20858	Acute Myeloid Leukemia	1.14098
GSM20685	Acute Myeloid Leukemia	1.15327
GSM20847	Acute Myeloid Leukemia	1.15451
GSM20918	Acute Myeloid Leukemia	1.15503
GSM20922	Acute Myeloid Leukemia	1.16563
GSM20895	Acute Myeloid Leukemia	1.18117
GSM20767	Acute Myeloid Leukemia	1.18429
GSM20759	Acute Myeloid Leukemia	1.18741
GSM20923	Acute Myeloid Leukemia	1.19583
GSM20912	Acute Myeloid Leukemia	1.19502
GSM20879	Acute Myeloid Leukemia	1.19498
GSM20921	Acute Myeloid Leukemia	1.19666
GSM20713	Acute Myeloid Leukemia	1.20105
GSM20743	Acute Myeloid Leukemia	1.20113
GSM20724	Acute Myeloid Leukemia	1.21226
GSM20729	Acute Myeloid Leukemia	1.21292
GSM20766	Acute Myeloid Leukemia	1.2148
GSM20933	Acute Myeloid Leukemia	1.22186
GSM20755	Acute Myeloid Leukemia	1.22479
GSM20935	Acute Myeloid Leukemia	1.23447
GSM20777	Acute Myeloid Leukemia	1.23462
GSM19383	Acute Myeloid Leukemia	1.23827
GSM20687	Acute Myeloid Leukemia	1.24027
GSM20882	Acute Myeloid Leukemia	1.26243
GSM20776	Acute Myeloid Leukemia	1.27228
GSM20844	Acute Myeloid Leukemia	1.28533
GSM20867	Acute Myeloid Leukemia	1.30765
GSM20926	Acute Myeloid Leukemia	1.31594
GSM20722	Acute Myeloid Leukemia	1.31985
GSM20781	Acute Myeloid Leukemia	1.3204
GSM20852	Acute Myeloid Leukemia	1.32045
GSM20948	Acute Myeloid Leukemia	1.32681
GSM20824	Acute Myeloid Leukemia	1.32701
GSM20898	Acute Myeloid Leukemia	1.32847
GSM20731	Acute Myeloid Leukemia	1.33246
GSM20962	Acute Myeloid Leukemia	1.33633
GSM20911	Acute Myeloid Leukemia	1.33792
GSM20801	Acute Myeloid Leukemia	1.34048
GSM20693	Acute Myeloid Leukemia	1.35147
GSM20706	Acute Myeloid Leukemia	1.35502
GSM20826	Acute Myeloid Leukemia	1.35793
GSM20876	Acute Myeloid Leukemia	1.36012
GSM20821	Acute Myeloid Leukemia	1.36191
GSM20853	Acute Myeloid Leukemia	1.36571
GSM20686	Acute Myeloid Leukemia	1.36769
GSM20896	Acute Myeloid Leukemia	1.37111
GSM20949	Acute Myeloid Leukemia	1.37714
GSM20808	Acute Myeloid Leukemia	1.40346
GSM20813	Acute Myeloid Leukemia	1.40439
GSM20717	Acute Myeloid Leukemia	1.40508
GSM20931	Acute Myeloid Leukemia	1.40992
GSM20768	Acute Myeloid Leukemia	1.41052
GSM20702	Acute Myeloid Leukemia	1.42341
GSM20966	Acute Myeloid Leukemia	1.43063
GSM20943	Acute Myeloid Leukemia	1.43074
GSM20782	Acute Myeloid Leukemia	1.4441
GSM20696	Acute Myeloid Leukemia	1.44763
GSM20779	Acute Myeloid Leukemia	1.44785
GSM20793	Acute Myeloid Leukemia	1.45094
GSM20944	Acute Myeloid Leukemia	1.45845
GSM20862	Acute Myeloid Leukemia	1.4601
GSM20830	Acute Myeloid Leukemia	1.46548
GSM20700	Acute Myeloid Leukemia	1.4747
GSM20873	Acute Myeloid Leukemia	1.48727
GSM20924	Acute Myeloid Leukemia	1.49326
GSM20838	Acute Myeloid Leukemia	1.51503
GSM20916	Acute Myeloid Leukemia	1.52524
GSM20690	Acute Myeloid Leukemia	1.53051
GSM20894	Acute Myeloid Leukemia	1.5308
GSM20889	Acute Myeloid Leukemia	1.53205
GSM20957	Acute Myeloid Leukemia	1.53403
GSM20964	Acute Myeloid Leukemia	1.53935
GSM20909	Acute Myeloid Leukemia	1.54207
GSM20920	Acute Myeloid Leukemia	1.54224
GSM20901	Acute Myeloid Leukemia	1.54341
GSM20915	Acute Myeloid Leukemia	1.54855
GSM20917	Acute Myeloid Leukemia	1.5505
GSM20902	Acute Myeloid Leukemia	1.55095
GSM20885	Acute Myeloid Leukemia	1.55586
GSM20940	Acute Myeloid Leukemia	1.56072
GSM20689	Acute Myeloid Leukemia	1.56188
GSM20869	Acute Myeloid Leukemia	1.56744
GSM20861	Acute Myeloid Leukemia	1.57221
GSM20913	Acute Myeloid Leukemia	1.58349
GSM20929	Acute Myeloid Leukemia	1.58372
GSM20733	Acute Myeloid Leukemia	1.58496
GSM20747	Acute Myeloid Leukemia	1.58628
GSM20818	Acute Myeloid Leukemia	1.59528
GSM20952	Acute Myeloid Leukemia	1.60572
GSM20893	Acute Myeloid Leukemia	1.60716
GSM20854	Acute Myeloid Leukemia	1.6085
GSM20950	Acute Myeloid Leukemia	1.62519
GSM20725	Acute Myeloid Leukemia	1.6256
GSM20880	Acute Myeloid Leukemia	1.62702
GSM20849	Acute Myeloid Leukemia	1.6283
GSM20795	Acute Myeloid Leukemia	1.62932
GSM20692	Acute Myeloid Leukemia	1.63227
GSM20783	Acute Myeloid Leukemia	1.64357
GSM20947	Acute Myeloid Leukemia	1.6441
GSM20831	Acute Myeloid Leukemia	1.64488
GSM20761	Acute Myeloid Leukemia	1.64927
GSM20764	Acute Myeloid Leukemia	1.65271
GSM20945	Acute Myeloid Leukemia	1.65427
GSM20719	Acute Myeloid Leukemia	1.65654
GSM20874	Acute Myeloid Leukemia	1.65701
GSM20823	Acute Myeloid Leukemia	1.65728
GSM20928	Acute Myeloid Leukemia	1.66114
GSM20804	Acute Myeloid Leukemia	1.66575
GSM20834	Acute Myeloid Leukemia	1.66953
GSM20810	Acute Myeloid Leukemia	1.67412
GSM20738	Acute Myeloid Leukemia	1.67475
GSM20905	Acute Myeloid Leukemia	1.67976
GSM20960	Acute Myeloid Leukemia	1.68078
GSM20881	Acute Myeloid Leukemia	1.68732
GSM20762	Acute Myeloid Leukemia	1.68793
GSM20899	Acute Myeloid Leukemia	1.68995
GSM20789	Acute Myeloid Leukemia	1.69075
GSM20757	Acute Myeloid Leukemia	1.70589
GSM20936	Acute Myeloid Leukemia	1.70632
GSM20787	Acute Myeloid Leukemia	1.71487
GSM20892	Acute Myeloid Leukemia	1.72859
GSM20816	Acute Myeloid Leukemia	1.73409
GSM20728	Acute Myeloid Leukemia	1.73495
GSM20910	Acute Myeloid Leukemia	1.74989
GSM20866	Acute Myeloid Leukemia	1.75605
GSM20836	Acute Myeloid Leukemia	1.75767
GSM20956	Acute Myeloid Leukemia	1.7619
GSM20688	Acute Myeloid Leukemia	1.76553
GSM20827	Acute Myeloid Leukemia	1.76848
GSM20771	Acute Myeloid Leukemia	1.77268
GSM20737	Acute Myeloid Leukemia	1.77524
GSM20684	Acute Myeloid Leukemia	1.7792
GSM20699	Acute Myeloid Leukemia	1.77957
GSM20798	Acute Myeloid Leukemia	1.78741
GSM20694	Acute Myeloid Leukemia	1.7909
GSM20955	Acute Myeloid Leukemia	1.79208
GSM20698	Acute Myeloid Leukemia	1.79636
GSM20850	Acute Myeloid Leukemia	1.79665
GSM19382	Acute Myeloid Leukemia	1.80908
GSM20828	Acute Myeloid Leukemia	1.81959
GSM20697	Acute Myeloid Leukemia	1.82368
GSM20709	Acute Myeloid Leukemia	1.83154
GSM20807	Acute Myeloid Leukemia	1.83158
GSM20811	Acute Myeloid Leukemia	1.83726
GSM20708	Acute Myeloid Leukemia	1.83939
GSM20701	Acute Myeloid Leukemia	1.83416
GSM20934	Acute Myeloid Leukemia	1.84018
GSM20797	Acute Myeloid Leukemia	1.84121
GSM20891	Acute Myeloid Leukemia	1.84886
GSM20900	Acute Myeloid Leukemia	1.85042
GSM20954	Acute Myeloid Leukemia	1.85528
GSM20758	Acute Myeloid Leukemia	1.85866
GSM20723	Acute Myeloid Leukemia	1.85886
GSM20953	Acute Myeloid Leukemia	1.85921
GSM20710	Acute Myeloid Leukemia	1.86178
GSM20704	Acute Myeloid Leukemia	1.8664
GSM20938	Acute Myeloid Leukemia	1.86695
GSM20715	Acute Myeloid Leukemia	1.8688
GSM20751	Acute Myeloid Leukemia	1.86998
GSM20786	Acute Myeloid Leukemia	1.87992
GSM20775	Acute Myeloid Leukemia	1.89757
GSM20705	Acute Myeloid Leukemia	1.90206
GSM20812	Acute Myeloid Leukemia	1.90317
GSM20809	Acute Myeloid Leukemia	1.9045
GSM20872	Acute Myeloid Leukemia	1.90476
GSM20884	Acute Myeloid Leukemia	1.9048
GSM20799	Acute Myeloid Leukemia	1.92287
GSM20951	Acute Myeloid Leukemia	1.93875
GSM20732	Acute Myeloid Leukemia	1.94195
GSM20716	Acute Myeloid Leukemia	1.95446
GSM20765	Acute Myeloid Leukemia	1.96227
GSM20752	Acute Myeloid Leukemia	1.9674
GSM20707	Acute Myeloid Leukemia	1.96886
GSM20888	Acute Myeloid Leukemia	1.9693
GSM20819	Acute Myeloid Leukemia	1.97358
GSM20855	Acute Myeloid Leukemia	1.97919
GSM20791	Acute Myeloid Leukemia	1.9904
GSM20774	Acute Myeloid Leukemia	1.99377
GSM20745	Acute Myeloid Leukemia	2.00284
GSM20887	Acute Myeloid Leukemia	2.02329
GSM20843	Acute Myeloid Leukemia	2.03251
GSM20919	Acute Myeloid Leukemia	2.03618
GSM20906	Acute Myeloid Leukemia	2.04355
GSM20748	Acute Myeloid Leukemia	2.04938
GSM20965	Acute Myeloid Leukemia	2.05226
GSM20739	Acute Myeloid Leukemia	2.05713
GSM20890	Acute Myeloid Leukemia	2.05965
GSM20695	Acute Myeloid Leukemia	2.06257
GSM20930	Acute Myeloid Leukemia	2.06451
GSM20712	Acute Myeloid Leukemia	2.07655
GSM20833	Acute Myeloid Leukemia	2.085
GSM20961	Acute Myeloid Leukemia	2.08631
GSM20750	Acute Myeloid Leukemia	2.08929
GSM20754	Acute Myeloid Leukemia	2.0964
GSM20851	Acute Myeloid Leukemia	2.10078
GSM20780	Acute Myeloid Leukemia	2.10425
GSM20753	Acute Myeloid Leukemia	2.10705
GSM20864	Acute Myeloid Leukemia	2.11548
GSM20871	Acute Myeloid Leukemia	2.11942
GSM20822	Acute Myeloid Leukemia	2.13342
GSM20756	Acute Myeloid Leukemia	2.1564
GSM20790	Acute Myeloid Leukemia	2.15915
GSM20802	Acute Myeloid Leukemia	2.20213
GSM20825	Acute Myeloid Leukemia	2.20351
GSM20749	Acute Myeloid Leukemia	2.22846
GSM20730	Acute Myeloid Leukemia	2.23129
GSM20857	Acute Myeloid Leukemia	2.23283
GSM20718	Acute Myeloid Leukemia	2.23769
GSM20817	Acute Myeloid Leukemia	2.23856
GSM20740	Acute Myeloid Leukemia	2.24236
GSM20856	Acute Myeloid Leukemia	2.28022
GSM20946	Acute Myeloid Leukemia	2.3159
GSM20794	Acute Myeloid Leukemia	2.33324
GSM20908	Acute Myeloid Leukemia	2.33523
GSM20742	Acute Myeloid Leukemia	2.35456
GSM20840	Acute Myeloid Leukemia	2.37826
GSM20832	Acute Myeloid Leukemia	2.39179
GSM20870	Acute Myeloid Leukemia	2.39271
GSM20746	Acute Myeloid Leukemia	2.40294
GSM20796	Acute Myeloid Leukemia	2.40881
GSM20714	Acute Myeloid Leukemia	2.44114
GSM20932	Acute Myeloid Leukemia	2.45054
GSM20703	Acute Myeloid Leukemia	2.48073
GSM20735	Acute Myeloid Leukemia	2.49794
GSM20800	Acute Myeloid Leukemia	2.50821
GSM20736	Acute Myeloid Leukemia	2.54749
GSM20863	Acute Myeloid Leukemia	2.61384
GSM20805	Acute Myeloid Leukemia	2.67056
GSM20803	Acute Myeloid Leukemia	2.67489
GSM20925	Acute Myeloid Leukemia	2.71259
GSM20741	Acute Myeloid Leukemia	2.77741
GSM20784	Acute Myeloid Leukemia	2.77999
GSM20792	Acute Myeloid Leukemia	2.85049
GSM20760	Acute Myeloid Leukemia	3.00466
GSM20734	Acute Myeloid Leukemia	3.0142
GSM20778	Acute Myeloid Leukemia	3.044
GSM20711	Acute Myeloid Leukemia	3.04573

## Sheet: TSC22D3(Valk Leukemia -207001)
Sample name	Sample source	Log2（TSC22D3 Expression）
GSM20974	Normal Tissue Type：Bone Marrow	1.71518
GSM20970	Normal Tissue Type：Bone Marrow	1.95966
GSM20971	Normal Tissue Type：Bone Marrow	1.97439
GSM20973	Normal Tissue Type：Bone Marrow	2.06042
GSM20972	Normal Tissue Type：Bone Marrow	2.38658
GSM20969	CD34-Positive Peripheral Blood Cell	0.15992
GSM20968	CD34-Positive Peripheral Blood Cell	0.44596
GSM20967	CD34-Positive Peripheral Blood Cell	1.41032
GSM20804	Acute Myeloid Leukemia	-0.23313
GSM20887	Acute Myeloid Leukemia	0.15754
GSM20833	Acute Myeloid Leukemia	0.17204
GSM20900	Acute Myeloid Leukemia	0.33732
GSM20814	Acute Myeloid Leukemia	0.61697
GSM20915	Acute Myeloid Leukemia	0.682
GSM20846	Acute Myeloid Leukemia	0.69188
GSM20808	Acute Myeloid Leukemia	0.70044
GSM20950	Acute Myeloid Leukemia	0.7451
GSM19383	Acute Myeloid Leukemia	0.75714
GSM20865	Acute Myeloid Leukemia	0.78483
GSM20954	Acute Myeloid Leukemia	0.87418
GSM20773	Acute Myeloid Leukemia	0.91934
GSM20731	Acute Myeloid Leukemia	0.9363
GSM20866	Acute Myeloid Leukemia	0.96285
GSM20896	Acute Myeloid Leukemia	0.98623
GSM20796	Acute Myeloid Leukemia	1
GSM20838	Acute Myeloid Leukemia	1.00914
GSM20837	Acute Myeloid Leukemia	1.04422
GSM20801	Acute Myeloid Leukemia	1.05031
GSM20824	Acute Myeloid Leukemia	1.05618
GSM20715	Acute Myeloid Leukemia	1.07669
GSM20820	Acute Myeloid Leukemia	1.08064
GSM20914	Acute Myeloid Leukemia	1.1143
GSM20779	Acute Myeloid Leukemia	1.12156
GSM20902	Acute Myeloid Leukemia	1.13856
GSM20917	Acute Myeloid Leukemia	1.1401
GSM20850	Acute Myeloid Leukemia	1.15743
GSM20892	Acute Myeloid Leukemia	1.15809
GSM20904	Acute Myeloid Leukemia	1.17079
GSM20818	Acute Myeloid Leukemia	1.17834
GSM20768	Acute Myeloid Leukemia	1.21378
GSM20939	Acute Myeloid Leukemia	1.26796
GSM20907	Acute Myeloid Leukemia	1.27325
GSM20879	Acute Myeloid Leukemia	1.29243
GSM20852	Acute Myeloid Leukemia	1.30256
GSM20867	Acute Myeloid Leukemia	1.33729
GSM20720	Acute Myeloid Leukemia	1.35921
GSM20759	Acute Myeloid Leukemia	1.39064
GSM20805	Acute Myeloid Leukemia	1.40934
GSM20738	Acute Myeloid Leukemia	1.4237
GSM20807	Acute Myeloid Leukemia	1.42523
GSM20709	Acute Myeloid Leukemia	1.43517
GSM20947	Acute Myeloid Leukemia	1.43787
GSM20872	Acute Myeloid Leukemia	1.44225
GSM20908	Acute Myeloid Leukemia	1.49462
GSM20799	Acute Myeloid Leukemia	1.51791
GSM20722	Acute Myeloid Leukemia	1.5345
GSM20841	Acute Myeloid Leukemia	1.57292
GSM20923	Acute Myeloid Leukemia	1.57579
GSM20885	Acute Myeloid Leukemia	1.58718
GSM20884	Acute Myeloid Leukemia	1.58757
GSM20702	Acute Myeloid Leukemia	1.60459
GSM20878	Acute Myeloid Leukemia	1.61495
GSM20855	Acute Myeloid Leukemia	1.62083
GSM20806	Acute Myeloid Leukemia	1.6258
GSM20723	Acute Myeloid Leukemia	1.63667
GSM20789	Acute Myeloid Leukemia	1.6567
GSM20782	Acute Myeloid Leukemia	1.66708
GSM20943	Acute Myeloid Leukemia	1.66877
GSM20936	Acute Myeloid Leukemia	1.68368
GSM20744	Acute Myeloid Leukemia	1.68494
GSM20783	Acute Myeloid Leukemia	1.71089
GSM20713	Acute Myeloid Leukemia	1.71523
GSM20848	Acute Myeloid Leukemia	1.7156
GSM20921	Acute Myeloid Leukemia	1.71683
GSM20815	Acute Myeloid Leukemia	1.72996
GSM20830	Acute Myeloid Leukemia	1.74117
GSM20862	Acute Myeloid Leukemia	1.75081
GSM20811	Acute Myeloid Leukemia	1.76798
GSM20899	Acute Myeloid Leukemia	1.79736
GSM20822	Acute Myeloid Leukemia	1.79757
GSM20746	Acute Myeloid Leukemia	1.79897
GSM20812	Acute Myeloid Leukemia	1.80393
GSM20844	Acute Myeloid Leukemia	1.80524
GSM20880	Acute Myeloid Leukemia	1.80557
GSM20708	Acute Myeloid Leukemia	1.81251
GSM20699	Acute Myeloid Leukemia	1.82336
GSM20774	Acute Myeloid Leukemia	1.83551
GSM20755	Acute Myeloid Leukemia	1.837
GSM20762	Acute Myeloid Leukemia	1.84506
GSM20726	Acute Myeloid Leukemia	1.85319
GSM20933	Acute Myeloid Leukemia	1.86969
GSM20717	Acute Myeloid Leukemia	1.88406
GSM20719	Acute Myeloid Leukemia	1.90689
GSM20942	Acute Myeloid Leukemia	1.91717
GSM20703	Acute Myeloid Leukemia	1.92106
GSM20928	Acute Myeloid Leukemia	1.92194
GSM20909	Acute Myeloid Leukemia	1.93174
GSM20780	Acute Myeloid Leukemia	1.93466
GSM20748	Acute Myeloid Leukemia	1.96954
GSM19382	Acute Myeloid Leukemia	1.97466
GSM20817	Acute Myeloid Leukemia	1.98838
GSM20834	Acute Myeloid Leukemia	1.99431
GSM20931	Acute Myeloid Leukemia	1.99488
GSM20813	Acute Myeloid Leukemia	1.99904
GSM20705	Acute Myeloid Leukemia	2.02531
GSM20730	Acute Myeloid Leukemia	2.04198
GSM20839	Acute Myeloid Leukemia	2.07198
GSM20790	Acute Myeloid Leukemia	2.08136
GSM20952	Acute Myeloid Leukemia	2.09442
GSM20888	Acute Myeloid Leukemia	2.09832
GSM20769	Acute Myeloid Leukemia	2.11573
GSM20764	Acute Myeloid Leukemia	2.17224
GSM20918	Acute Myeloid Leukemia	2.1891
GSM20809	Acute Myeloid Leukemia	2.21081
GSM20727	Acute Myeloid Leukemia	2.21491
GSM20797	Acute Myeloid Leukemia	2.23023
GSM20925	Acute Myeloid Leukemia	2.25309
GSM20743	Acute Myeloid Leukemia	2.25833
GSM20932	Acute Myeloid Leukemia	2.26432
GSM20725	Acute Myeloid Leukemia	2.29782
GSM20840	Acute Myeloid Leukemia	2.30131
GSM20924	Acute Myeloid Leukemia	2.30833
GSM20753	Acute Myeloid Leukemia	2.30949
GSM20883	Acute Myeloid Leukemia	2.31399
GSM20927	Acute Myeloid Leukemia	2.32193
GSM20756	Acute Myeloid Leukemia	2.33581
GSM20937	Acute Myeloid Leukemia	2.34207
GSM20922	Acute Myeloid Leukemia	2.35397
GSM20740	Acute Myeloid Leukemia	2.38054
GSM20949	Acute Myeloid Leukemia	2.38143
GSM20963	Acute Myeloid Leukemia	2.39624
GSM20757	Acute Myeloid Leukemia	2.40108
GSM20728	Acute Myeloid Leukemia	2.40428
GSM20926	Acute Myeloid Leukemia	2.42156
GSM20761	Acute Myeloid Leukemia	2.44176
GSM20935	Acute Myeloid Leukemia	2.44632
GSM20881	Acute Myeloid Leukemia	2.44976
GSM20798	Acute Myeloid Leukemia	2.46181
GSM20749	Acute Myeloid Leukemia	2.47169
GSM20716	Acute Myeloid Leukemia	2.48877
GSM20772	Acute Myeloid Leukemia	2.49418
GSM20849	Acute Myeloid Leukemia	2.52116
GSM20951	Acute Myeloid Leukemia	2.52788
GSM20965	Acute Myeloid Leukemia	2.53347
GSM20758	Acute Myeloid Leukemia	2.56251
GSM20961	Acute Myeloid Leukemia	2.57121
GSM20819	Acute Myeloid Leukemia	2.59527
GSM20821	Acute Myeloid Leukemia	2.60012
GSM20701	Acute Myeloid Leukemia	2.60214
GSM20856	Acute Myeloid Leukemia	2.60231
GSM20766	Acute Myeloid Leukemia	2.61759
GSM20895	Acute Myeloid Leukemia	2.62009
GSM20776	Acute Myeloid Leukemia	2.6313
GSM20897	Acute Myeloid Leukemia	2.63131
GSM20685	Acute Myeloid Leukemia	2.63555
GSM20816	Acute Myeloid Leukemia	2.64057
GSM20787	Acute Myeloid Leukemia	2.64536
GSM20697	Acute Myeloid Leukemia	2.67167
GSM20941	Acute Myeloid Leukemia	2.68993
GSM20875	Acute Myeloid Leukemia	2.69135
GSM20823	Acute Myeloid Leukemia	2.69749
GSM20687	Acute Myeloid Leukemia	2.70922
GSM20859	Acute Myeloid Leukemia	2.7519
GSM20894	Acute Myeloid Leukemia	2.76706
GSM20874	Acute Myeloid Leukemia	2.76707
GSM20877	Acute Myeloid Leukemia	2.8009
GSM20864	Acute Myeloid Leukemia	2.80634
GSM20871	Acute Myeloid Leukemia	2.81102
GSM20721	Acute Myeloid Leukemia	2.8149
GSM20777	Acute Myeloid Leukemia	2.81597
GSM20911	Acute Myeloid Leukemia	2.81759
GSM20938	Acute Myeloid Leukemia	2.81973
GSM20692	Acute Myeloid Leukemia	2.8357
GSM20707	Acute Myeloid Leukemia	2.83927
GSM20964	Acute Myeloid Leukemia	2.84776
GSM20763	Acute Myeloid Leukemia	2.86006
GSM20765	Acute Myeloid Leukemia	2.93582
GSM20889	Acute Myeloid Leukemia	2.94033
GSM20836	Acute Myeloid Leukemia	2.97195
GSM20828	Acute Myeloid Leukemia	2.9917
GSM20767	Acute Myeloid Leukemia	3.00789
GSM20693	Acute Myeloid Leukemia	3.01187
GSM20684	Acute Myeloid Leukemia	3.0132
GSM20851	Acute Myeloid Leukemia	3.01391
GSM20870	Acute Myeloid Leukemia	3.01452
GSM20795	Acute Myeloid Leukemia	3.02902
GSM20912	Acute Myeloid Leukemia	3.04011
GSM20869	Acute Myeloid Leukemia	3.04013
GSM20785	Acute Myeloid Leukemia	3.06187
GSM20750	Acute Myeloid Leukemia	3.06632
GSM20826	Acute Myeloid Leukemia	3.06789
GSM20781	Acute Myeloid Leukemia	3.08071
GSM20957	Acute Myeloid Leukemia	3.08246
GSM20784	Acute Myeloid Leukemia	3.10434
GSM20733	Acute Myeloid Leukemia	3.10725
GSM20778	Acute Myeloid Leukemia	3.1326
GSM20831	Acute Myeloid Leukemia	3.14601
GSM20729	Acute Myeloid Leukemia	3.14816
GSM20853	Acute Myeloid Leukemia	3.16489
GSM20854	Acute Myeloid Leukemia	3.16742
GSM20940	Acute Myeloid Leukemia	3.16752
GSM20739	Acute Myeloid Leukemia	3.18354
GSM20953	Acute Myeloid Leukemia	3.20008
GSM20966	Acute Myeloid Leukemia	3.23486
GSM20786	Acute Myeloid Leukemia	3.23734
GSM20732	Acute Myeloid Leukemia	3.25968
GSM20890	Acute Myeloid Leukemia	3.27551
GSM20736	Acute Myeloid Leukemia	3.29454
GSM20810	Acute Myeloid Leukemia	3.31058
GSM20945	Acute Myeloid Leukemia	3.31063
GSM20793	Acute Myeloid Leukemia	3.31298
GSM20960	Acute Myeloid Leukemia	3.31322
GSM20847	Acute Myeloid Leukemia	3.326
GSM20704	Acute Myeloid Leukemia	3.33231
GSM20920	Acute Myeloid Leukemia	3.34282
GSM20916	Acute Myeloid Leukemia	3.34318
GSM20792	Acute Myeloid Leukemia	3.35426
GSM20745	Acute Myeloid Leukemia	3.36887
GSM20747	Acute Myeloid Leukemia	3.39382
GSM20791	Acute Myeloid Leukemia	3.39832
GSM20934	Acute Myeloid Leukemia	3.40085
GSM20794	Acute Myeloid Leukemia	3.4022
GSM20832	Acute Myeloid Leukemia	3.41189
GSM20690	Acute Myeloid Leukemia	3.42672
GSM20825	Acute Myeloid Leukemia	3.42889
GSM20835	Acute Myeloid Leukemia	3.45311
GSM20754	Acute Myeloid Leukemia	3.43506
GSM20691	Acute Myeloid Leukemia	3.444
GSM20698	Acute Myeloid Leukemia	3.44105
GSM20835	Acute Myeloid Leukemia	3.45311
GSM20930	Acute Myeloid Leukemia	3.45783
GSM20706	Acute Myeloid Leukemia	3.46522
GSM20857	Acute Myeloid Leukemia	3.47377
GSM20689	Acute Myeloid Leukemia	3.47427
GSM20688	Acute Myeloid Leukemia	3.49065
GSM20910	Acute Myeloid Leukemia	3.49442
GSM20724	Acute Myeloid Leukemia	3.49932
GSM20955	Acute Myeloid Leukemia	3.50588
GSM20946	Acute Myeloid Leukemia	3.58568
GSM20845	Acute Myeloid Leukemia	3.58779
GSM20873	Acute Myeloid Leukemia	3.59272
GSM20735	Acute Myeloid Leukemia	3.59556
GSM20770	Acute Myeloid Leukemia	3.60752
GSM20929	Acute Myeloid Leukemia	3.64132
GSM20802	Acute Myeloid Leukemia	3.64309
GSM20868	Acute Myeloid Leukemia	3.64599
GSM20829	Acute Myeloid Leukemia	3.65025
GSM20876	Acute Myeloid Leukemia	3.6738
GSM20858	Acute Myeloid Leukemia	3.68074
GSM20700	Acute Myeloid Leukemia	3.68083
GSM20842	Acute Myeloid Leukemia	3.69972
GSM20962	Acute Myeloid Leukemia	3.70011
GSM20686	Acute Myeloid Leukemia	3.70961
GSM20694	Acute Myeloid Leukemia	3.72806
GSM20886	Acute Myeloid Leukemia	3.7305
GSM20788	Acute Myeloid Leukemia	3.75108
GSM20891	Acute Myeloid Leukemia	3.7546
GSM20882	Acute Myeloid Leukemia	3.76591
GSM20958	Acute Myeloid Leukemia	3.81498
GSM20751	Acute Myeloid Leukemia	3.82602
GSM20913	Acute Myeloid Leukemia	3.83791
GSM20710	Acute Myeloid Leukemia	3.86009
GSM20696	Acute Myeloid Leukemia	3.90102
GSM20956	Acute Myeloid Leukemia	3.91042
GSM20901	Acute Myeloid Leukemia	3.94462
GSM20771	Acute Myeloid Leukemia	3.97933
GSM20695	Acute Myeloid Leukemia	3.98594
GSM20737	Acute Myeloid Leukemia	3.98906
GSM20718	Acute Myeloid Leukemia	4.03772
GSM20893	Acute Myeloid Leukemia	4.05531
GSM20898	Acute Myeloid Leukemia	4.08118
GSM20760	Acute Myeloid Leukemia	4.11476
GSM20800	Acute Myeloid Leukemia	4.15338
GSM20714	Acute Myeloid Leukemia	4.18027
GSM20948	Acute Myeloid Leukemia	4.21846
GSM20905	Acute Myeloid Leukemia	4.23632
GSM20803	Acute Myeloid Leukemia	4.25177
GSM20742	Acute Myeloid Leukemia	4.26321
GSM20752	Acute Myeloid Leukemia	4.26898
GSM20944	Acute Myeloid Leukemia	4.28679
GSM20959	Acute Myeloid Leukemia	4.28991
GSM20861	Acute Myeloid Leukemia	4.29186
GSM20741	Acute Myeloid Leukemia	4.33903
GSM20919	Acute Myeloid Leukemia	4.3469
GSM20860	Acute Myeloid Leukemia	4.36895
GSM20906	Acute Myeloid Leukemia	4.38476
GSM20903	Acute Myeloid Leukemia	4.4448
GSM20863	Acute Myeloid Leukemia	4.46684
GSM20775	Acute Myeloid Leukemia	4.53173
GSM20843	Acute Myeloid Leukemia	4.57185
GSM20711	Acute Myeloid Leukemia	4.63409
GSM20734	Acute Myeloid Leukemia	4.71024
GSM20712	Acute Myeloid Leukemia	4.90912

## Sheet: TSC22D4 （Valk Leukemia-208104）
Sample name	Sample source	Log2（TSC22D4 Expression）
GSM20974	Normal Tissue Type：Bone Marrow	1.40146
GSM20972	Normal Tissue Type：Bone Marrow	1.50838
GSM20970	Normal Tissue Type：Bone Marrow	1.53337
GSM20973	Normal Tissue Type：Bone Marrow	1.57799
GSM20971	Normal Tissue Type：Bone Marrow	2.0122
GSM20967	CD34-Positive Peripheral Blood Cell	1.14651
GSM20969	CD34-Positive Peripheral Blood Cell	1.18291
GSM20968	CD34-Positive Peripheral Blood Cell	1.23743
GSM20826	Acute Myeloid Leukemia	-0.08592
GSM20760	Acute Myeloid Leukemia	-0.07662
GSM20825	Acute Myeloid Leukemia	0.18096
GSM20849	Acute Myeloid Leukemia	0.28335
GSM20790	Acute Myeloid Leukemia	0.40117
GSM20828	Acute Myeloid Leukemia	0.40424
GSM20777	Acute Myeloid Leukemia	0.42693
GSM20823	Acute Myeloid Leukemia	0.48294
GSM20840	Acute Myeloid Leukemia	0.54139
GSM20923	Acute Myeloid Leukemia	0.60314
GSM20888	Acute Myeloid Leukemia	0.61403
GSM20884	Acute Myeloid Leukemia	0.71723
GSM20944	Acute Myeloid Leukemia	0.77881
GSM20936	Acute Myeloid Leukemia	0.80973
GSM20816	Acute Myeloid Leukemia	0.81436
GSM20886	Acute Myeloid Leukemia	0.85976
GSM20867	Acute Myeloid Leukemia	0.87081
GSM20700	Acute Myeloid Leukemia	0.87168
GSM20848	Acute Myeloid Leukemia	0.8732
GSM20857	Acute Myeloid Leukemia	0.87591
GSM20835	Acute Myeloid Leukemia	0.90094
GSM20879	Acute Myeloid Leukemia	0.93303
GSM20866	Acute Myeloid Leukemia	0.93388
GSM20754	Acute Myeloid Leukemia	0.93809
GSM20850	Acute Myeloid Leukemia	0.94615
GSM20843	Acute Myeloid Leukemia	0.94682
GSM20698	Acute Myeloid Leukemia	0.95737
GSM20962	Acute Myeloid Leukemia	0.96772
GSM20803	Acute Myeloid Leukemia	0.97541
GSM20834	Acute Myeloid Leukemia	0.97902
GSM20753	Acute Myeloid Leukemia	0.99086
GSM20766	Acute Myeloid Leukemia	1.00881
GSM20741	Acute Myeloid Leukemia	1.02338
GSM20771	Acute Myeloid Leukemia	1.0454
GSM20764	Acute Myeloid Leukemia	1.04943
GSM20961	Acute Myeloid Leukemia	1.04995
GSM20693	Acute Myeloid Leukemia	1.06485
GSM20814	Acute Myeloid Leukemia	1.06609
GSM20769	Acute Myeloid Leukemia	1.06817
GSM20732	Acute Myeloid Leukemia	1.07671
GSM20817	Acute Myeloid Leukemia	1.09335
GSM20792	Acute Myeloid Leukemia	1.0949
GSM20829	Acute Myeloid Leukemia	1.11321
GSM20925	Acute Myeloid Leukemia	1.11431
GSM20701	Acute Myeloid Leukemia	1.12102
GSM20846	Acute Myeloid Leukemia	1.12244
GSM20839	Acute Myeloid Leukemia	1.12785
GSM20957	Acute Myeloid Leukemia	1.13245
GSM20938	Acute Myeloid Leukemia	1.14166
GSM20872	Acute Myeloid Leukemia	1.1449
GSM20863	Acute Myeloid Leukemia	1.1669
GSM20833	Acute Myeloid Leukemia	1.16696
GSM20883	Acute Myeloid Leukemia	1.1691
GSM20838	Acute Myeloid Leukemia	1.17128
GSM20773	Acute Myeloid Leukemia	1.20313
GSM20937	Acute Myeloid Leukemia	1.2062
GSM20820	Acute Myeloid Leukemia	1.20666
GSM20695	Acute Myeloid Leukemia	1.21323
GSM20687	Acute Myeloid Leukemia	1.22239
GSM20767	Acute Myeloid Leukemia	1.22904
GSM20947	Acute Myeloid Leukemia	1.23484
GSM20943	Acute Myeloid Leukemia	1.23675
GSM20822	Acute Myeloid Leukemia	1.23937
GSM20789	Acute Myeloid Leukemia	1.24022
GSM20827	Acute Myeloid Leukemia	1.2417
GSM20774	Acute Myeloid Leukemia	1.24606
GSM20856	Acute Myeloid Leukemia	1.25037
GSM20714	Acute Myeloid Leukemia	1.25067
GSM20730	Acute Myeloid Leukemia	1.25924
GSM20738	Acute Myeloid Leukemia	1.2661
GSM20917	Acute Myeloid Leukemia	1.2661
GSM20912	Acute Myeloid Leukemia	1.27339
GSM20903	Acute Myeloid Leukemia	1.27762
GSM20955	Acute Myeloid Leukemia	1.29183
GSM20874	Acute Myeloid Leukemia	1.29426
GSM20762	Acute Myeloid Leukemia	1.2978
GSM20842	Acute Myeloid Leukemia	1.29985
GSM20781	Acute Myeloid Leukemia	1.30039
GSM20740	Acute Myeloid Leukemia	1.30066
GSM20847	Acute Myeloid Leukemia	1.30426
GSM20885	Acute Myeloid Leukemia	1.30454
GSM20951	Acute Myeloid Leukemia	1.31575
GSM20763	Acute Myeloid Leukemia	1.31847
GSM20893	Acute Myeloid Leukemia	1.33603
GSM20895	Acute Myeloid Leukemia	1.34077
GSM20832	Acute Myeloid Leukemia	1.35218
GSM20954	Acute Myeloid Leukemia	1.35473
GSM20942	Acute Myeloid Leukemia	1.35861
GSM20935	Acute Myeloid Leukemia	1.3593
GSM20919	Acute Myeloid Leukemia	1.36435
GSM20756	Acute Myeloid Leukemia	1.37455
GSM19784	Acute Myeloid Leukemia	1.37699
GSM20748	Acute Myeloid Leukemia	1.38407
GSM20966	Acute Myeloid Leukemia	1.38474
GSM20859	Acute Myeloid Leukemia	1.39202
GSM20783	Acute Myeloid Leukemia	1.39744
GSM20755	Acute Myeloid Leukemia	1.39869
GSM20747	Acute Myeloid Leukemia	1.40763
GSM20950	Acute Myeloid Leukemia	1.41039
GSM20880	Acute Myeloid Leukemia	1.41152
GSM20708	Acute Myeloid Leukemia	1.41545
GSM20811	Acute Myeloid Leukemia	1.41975
GSM20757	Acute Myeloid Leukemia	1.41976
GSM20877	Acute Myeloid Leukemia	1.42884
GSM20727	Acute Myeloid Leukemia	1.42934
GSM20799	Acute Myeloid Leukemia	1.43117
GSM20721	Acute Myeloid Leukemia	1.43477
GSM20889	Acute Myeloid Leukemia	1.43484
GSM20844	Acute Myeloid Leukemia	1.43636
GSM20858	Acute Myeloid Leukemia	1.43837
GSM20868	Acute Myeloid Leukemia	1.4419
GSM20750	Acute Myeloid Leukemia	1.44526
GSM20798	Acute Myeloid Leukemia	1.44608
GSM20782	Acute Myeloid Leukemia	1.45502
GSM20684	Acute Myeloid Leukemia	1.45943
GSM20703	Acute Myeloid Leukemia	1.46385
GSM20836	Acute Myeloid Leukemia	1.46749
GSM20697	Acute Myeloid Leukemia	1.47444
GSM20812	Acute Myeloid Leukemia	1.48172
GSM20926	Acute Myeloid Leukemia	1.48569
GSM20870	Acute Myeloid Leukemia	1.48572
GSM20761	Acute Myeloid Leukemia	1.49158
GSM20800	Acute Myeloid Leukemia	1.49176
GSM20864	Acute Myeloid Leukemia	1.49248
GSM20796	Acute Myeloid Leukemia	1.49551
GSM20890	Acute Myeloid Leukemia	1.49599
GSM20965	Acute Myeloid Leukemia	1.49832
GSM20841	Acute Myeloid Leukemia	1.50796
GSM20851	Acute Myeloid Leukemia	1.51755
GSM20813	Acute Myeloid Leukemia	1.51785
GSM20778	Acute Myeloid Leukemia	1.51887
GSM20765	Acute Myeloid Leukemia	1.52412
GSM20746	Acute Myeloid Leukemia	1.53831
GSM20689	Acute Myeloid Leukemia	1.54367
GSM20860	Acute Myeloid Leukemia	1.54871
GSM20686	Acute Myeloid Leukemia	1.55386
GSM20854	Acute Myeloid Leukemia	1.55594
GSM20815	Acute Myeloid Leukemia	1.56469
GSM20946	Acute Myeloid Leukemia	1.56478
GSM20759	Acute Myeloid Leukemia	1.57023
GSM20855	Acute Myeloid Leukemia	1.57994
GSM20794	Acute Myeloid Leukemia	1.58117
GSM20685	Acute Myeloid Leukemia	1.58254
GSM20953	Acute Myeloid Leukemia	1.58364
GSM20758	Acute Myeloid Leukemia	1.58365
GSM20752	Acute Myeloid Leukemia	1.58631
GSM20717	Acute Myeloid Leukemia	1.5879
GSM20894	Acute Myeloid Leukemia	1.59113
GSM19383	Acute Myeloid Leukemia	1.59956
GSM20869	Acute Myeloid Leukemia	1.6036
GSM19382	Acute Myeloid Leukemia	1.61545
GSM20948	Acute Myeloid Leukemia	1.62251
GSM20882	Acute Myeloid Leukemia	1.6205
GSM20940	Acute Myeloid Leukemia	1.61589
GSM20810	Acute Myeloid Leukemia	1.62539
GSM20725	Acute Myeloid Leukemia	1.6256
GSM20830	Acute Myeloid Leukemia	1.63102
GSM20736	Acute Myeloid Leukemia	1.63214
GSM20819	Acute Myeloid Leukemia	1.63826
GSM20958	Acute Myeloid Leukemia	1.64131
GSM20900	Acute Myeloid Leukemia	1.64856
GSM20742	Acute Myeloid Leukemia	1.64977
GSM20824	Acute Myeloid Leukemia	1.65131
GSM20776	Acute Myeloid Leukemia	1.6546
GSM20722	Acute Myeloid Leukemia	1.65694
GSM20751	Acute Myeloid Leukemia	1.66232
GSM20704	Acute Myeloid Leukemia	1.66269
GSM20793	Acute Myeloid Leukemia	1.66663
GSM20818	Acute Myeloid Leukemia	1.67202
GSM20918	Acute Myeloid Leukemia	1.6725
GSM20956	Acute Myeloid Leukemia	1.67338
GSM20959	Acute Myeloid Leukemia	1.67679
GSM20688	Acute Myeloid Leukemia	1.67807
GSM20904	Acute Myeloid Leukemia	1.67929
GSM20779	Acute Myeloid Leukemia	1.68203
GSM20696	Acute Myeloid Leukemia	1.68323
GSM20952	Acute Myeloid Leukemia	1.68372
GSM20939	Acute Myeloid Leukemia	1.68816
GSM20768	Acute Myeloid Leukemia	1.69178
GSM20802	Acute Myeloid Leukemia	1.69251
GSM20887	Acute Myeloid Leukemia	1.69584
GSM20808	Acute Myeloid Leukemia	1.69656
GSM20699	Acute Myeloid Leukemia	1.70128
GSM20899	Acute Myeloid Leukemia	1.70804
GSM20911	Acute Myeloid Leukemia	1.71049
GSM20892	Acute Myeloid Leukemia	1.71201
GSM20716	Acute Myeloid Leukemia	1.7123
GSM20837	Acute Myeloid Leukemia	1.72475
GSM20806	Acute Myeloid Leukemia	1.72727
GSM20898	Acute Myeloid Leukemia	1.73039
GSM20731	Acute Myeloid Leukemia	1.73659
GSM20770	Acute Myeloid Leukemia	1.74058
GSM20905	Acute Myeloid Leukemia	1.74068
GSM20901	Acute Myeloid Leukemia	1.74151
GSM20707	Acute Myeloid Leukemia	1.74362
GSM20916	Acute Myeloid Leukemia	1.7506
GSM20910	Acute Myeloid Leukemia	1.75132
GSM20711	Acute Myeloid Leukemia	1.7611
GSM20922	Acute Myeloid Leukemia	1.76258
GSM20845	Acute Myeloid Leukemia	1.76553
GSM20807	Acute Myeloid Leukemia	1.7675
GSM20744	Acute Myeloid Leukemia	1.76923
GSM20706	Acute Myeloid Leukemia	1.76928
GSM20709	Acute Myeloid Leukemia	1.77654
GSM20927	Acute Myeloid Leukemia	1.77745
GSM20785	Acute Myeloid Leukemia	1.78487
GSM20964	Acute Myeloid Leukemia	1.78609
GSM20906	Acute Myeloid Leukemia	1.79131
GSM20878	Acute Myeloid Leukemia	1.79317
GSM20891	Acute Myeloid Leukemia	1.794
GSM20734	Acute Myeloid Leukemia	1.80082
GSM20933	Acute Myeloid Leukemia	1.80145
GSM20907	Acute Myeloid Leukemia	1.80246
GSM20896	Acute Myeloid Leukemia	1.80294
GSM20749	Acute Myeloid Leukemia	1.80901
GSM20690	Acute Myeloid Leukemia	1.81014
GSM20772	Acute Myeloid Leukemia	1.81303
GSM20897	Acute Myeloid Leukemia	1.81371
GSM20713	Acute Myeloid Leukemia	1.8144
GSM20862	Acute Myeloid Leukemia	1.81674
GSM20913	Acute Myeloid Leukemia	1.82676
GSM20801	Acute Myeloid Leukemia	1.83167
GSM20787	Acute Myeloid Leukemia	1.83307
GSM20921	Acute Myeloid Leukemia	1.83964
GSM20705	Acute Myeloid Leukemia	1.84989
GSM20852	Acute Myeloid Leukemia	1.85005
GSM20691	Acute Myeloid Leukemia	1.86038
GSM20719	Acute Myeloid Leukemia	1.86121
GSM20715	Acute Myeloid Leukemia	1.86767
GSM20805	Acute Myeloid Leukemia	1.87259
GSM20963	Acute Myeloid Leukemia	1.88657
GSM20745	Acute Myeloid Leukemia	1.90411
GSM20853	Acute Myeloid Leukemia	1.90463
GSM20929	Acute Myeloid Leukemia	1.90664
GSM20692	Acute Myeloid Leukemia	1.91009
GSM20908	Acute Myeloid Leukemia	1.91163
GSM20960	Acute Myeloid Leukemia	1.91311
GSM20710	Acute Myeloid Leukemia	1.91585
GSM20729	Acute Myeloid Leukemia	1.91594
GSM20831	Acute Myeloid Leukemia	1.91766
GSM20786	Acute Myeloid Leukemia	1.92177
GSM20739	Acute Myeloid Leukemia	1.93247
GSM20723	Acute Myeloid Leukemia	1.93786
GSM20920	Acute Myeloid Leukemia	1.94143
GSM20915	Acute Myeloid Leukemia	1.95202
GSM20804	Acute Myeloid Leukemia	1.95882
GSM20702	Acute Myeloid Leukemia	1.95992
GSM20873	Acute Myeloid Leukemia	1.96083
GSM20694	Acute Myeloid Leukemia	1.9623
GSM20737	Acute Myeloid Leukemia	1.97028
GSM20876	Acute Myeloid Leukemia	1.9756
GSM20865	Acute Myeloid Leukemia	1.9759
GSM20861	Acute Myeloid Leukemia	1.97841
GSM20773	Acute Myeloid Leukemia	1.99161
GSM20949	Acute Myeloid Leukemia	1.99328
GSM20945	Acute Myeloid Leukemia	1.99598
GSM20871	Acute Myeloid Leukemia	2.00128
GSM20780	Acute Myeloid Leukemia	2.00491
GSM20724	Acute Myeloid Leukemia	2.00829
GSM20743	Acute Myeloid Leukemia	2.01835
GSM20941	Acute Myeloid Leukemia	2.0432
GSM20735	Acute Myeloid Leukemia	2.04381
GSM20930	Acute Myeloid Leukemia	2.05396
GSM20795	Acute Myeloid Leukemia	2.05651
GSM20797	Acute Myeloid Leukemia	2.05685
GSM20775	Acute Myeloid Leukemia	2.06085
GSM20881	Acute Myeloid Leukemia	2.08913
GSM20718	Acute Myeloid Leukemia	2.09277
GSM20726	Acute Myeloid Leukemia	2.09722
GSM20914	Acute Myeloid Leukemia	2.10452
GSM20875	Acute Myeloid Leukemia	2.12265
GSM20809	Acute Myeloid Leukemia	2.13031
GSM20791	Acute Myeloid Leukemia	2.14721
GSM20931	Acute Myeloid Leukemia	2.18303
GSM20934	Acute Myeloid Leukemia	2.2389
GSM20821	Acute Myeloid Leukemia	2.25106
GSM20712	Acute Myeloid Leukemia	2.2609
GSM20902	Acute Myeloid Leukemia	2.26981
GSM20720	Acute Myeloid Leukemia	2.31131
GSM20919	Acute Myeloid Leukemia	2.31482
GSM20728	Acute Myeloid Leukemia	2.33997
GSM20932	Acute Myeloid Leukemia	2.37337
GSM20924	Acute Myeloid Leukemia	2.37591
GSM20928	Acute Myeloid Leukemia	2.54333
GSM20909	Acute Myeloid Leukemia	2.84374
